# Supplementary material for: Impact of cooling on shaping ability of thermally treated files in canal models with double curvature
Source: PeerJ. 2023 Aug 8;11:e15830. doi: 10.7717/peerj.15830 (PMC10416767; doi:10.7717/peerj.15830)
Supplement: File S1 [file peerj-11-15830-s001.xlsx]

## Sheet: Grouping
No.	File System	No. of insertions		Maximum torque		MAX	Time						TOTAL	Detailed time	No.	File System	No. of insertions		Maximum torque		MAX	Time						TOTAL	Detailed time	No.	File System	No. of insertions		Maximum torque		MAX	Time						TOTAL	Detailed time	No.	File System	No. of insertions		Maximum torque
							1st file			2nd file												1st file			2nd file												1st file			2nd file
		1st file	2nd file	1st file	2nd file		1st	2nd	3rd	1st	2nd	3rd					1st file	2nd file	1st file	2nd file		1st	2nd	3rd	1st	2nd	3rd					1st file	2nd file	1st file	2nd file		1st	2nd	3rd	1st	2nd	3rd					1st file	2nd file	1st file
1	P	2	3	1.2	1.8	1.8	6	5		5	5	4	25	70	6	Pc	2	2	1.7	1.2	1.7	7	6		5	6		24	59	4	Zc	1	2	1.2	2	2	5			5	3		13	38	3	Z	2	2	0.7
9	P	2	2	1.4	1.7	1.7	5	5		7	6		23	58	10	Pc	2	2	1.3	0.9	1.3	6	5		5	5		21	56	8	Zc	1	2	0.7	1.5	1.5	6			5	6		17	42	7	Z	2	2	0.3
13	P	2	2	1.3	1.5	1.5	5	5		7	6		23	58	14	Pc	2	2	1.3	1.5	1.5	7	6		5	9		27	62	12	Zc	2	2	0.6	1.9	1.9	5	5		5	5		20	55	11	Z	1	2	0.5
17	P	2	2	1.4	1.5	1.5	5	5		5	6		21	56	18	Pc	2	2	1.2	1.7	1.7	5	6		6	7		24	59	15	Zc	1	2	0.6	1.8	1.8	5			4	5		14	39	16	Z	1	2	0.5
20	P	2	2	1.3	1.6	1.6	6	6		5	5		22	57	22	Pc	2	3	1.2	1.3	1.3	6	6		6	5	5	28	73	21	Zc	2	2	0.5	1	1	6	6		5	5		22	57	23	Z	2	2	0.6
25	P	2	3	1.8	1.6	1.8	5	5		5	7	4	26	71	26	Pc	3	2	1.8	1.2	1.8	7	6	5	6	6		30	75	24	Zc	2	2	0.8	1.5	1.5	5	5		6	5		21	56	27	Z	2	2	0.6
28	P	3	3	1	1.4	1.4	5	5	7	5	6	4	32	87	30	Pc	2	3	1.1	1.1	1.1	6	7		5	7	5	30	75	29	Zc	2	2	1.1	1.7	1.7	5	6		5	3		19	54	31	Z	2	2	0.8
37	P	2	2	1.4	1	1.4	5	5		5	5		20	55	34	Pc	2	3	1.1	1	1.1	6	5		6	5	5	27	72	40	Zc	2	1	0.8	1.4	1.4	5	4		7			16	41	35	Z	1	2	0.4
42	P	2	3	1.2	1.7	1.7	6	6		5	5	4	26	71	38	Pc	2	2	1.4	2.9	2.9	5	5		6	5		21	56	44	Zc	2	2	0.8	2	2	5	5		5	5		20	55	43	Z	2	3	0.8
45	P	2	2	1.1	1.9	1.9	5	6		6	5		22	57	41	Pc	2	3	1.7	1.1	1.7	5	5		5	5	5	25	70	48	Zc	2	2	0.7	1.5	1.5	5	5		5	6		21	56	51	Z	1	2	0.6
49	P	2	3	1.8	1.8	1.8	6	6		8	6	6	32	77	46	Pc	1	2	1.2	1.4	1.4	6			6	5		17	42	52	Zc	1	2	0.6	1.5	1.5	6			6	3		15	40	55	Z	2	2	0.6
53	P	2	3	1.9	2	2	5	6		5	5	2	23	68	50	Pc	2	2	1.3	1.5	1.5	6	7		7	6		26	61	60	Zc	1	2	0.6	1.6	1.6	6			7	6		19	44	62	Z	1	2	0.6
57	P	2	2	1.5	1.9	1.9	6	5		6	5		22	57	54	Pc	2	2	1.6	1.7	1.7	7	6		7	3		23	58	63	Zc	1	2	0.9	2	2	7			5	3		15	40	65	Z	1	2	0.7
61	P	2	2	1.1	1.6	1.6	5	7		6	6		24	59	58	Pc	2	2	1.7	1.8	1.8	7	5		7	6		25	60	67	Zc	1	2	0.6	1.4	1.4	6			5	5		16	41	66	Z	1	2	0.7
	AVG	2.07143	2.42857	1.38571	1.64286	1.68571							24.3571	64.3571			2	2.28571	1.4	1.45	1.60714							24.8571	62.7143			1.5	1.92857	0.75	1.62857	1.62857							17.7143	47			1.5	2.07143	0.6
	SD	0.267261	0.513553	0.279717	0.253329	0.191581							3.67124	9.74764			0.392232	0.468807	0.248069	0.500384	0.442831							3.61316	9.31028			0.518875	0.267261	0.202864	0.289372	0.289372							2.92018	7.78559			0.518875	0.267261	0.141421
	Min	2	2	1	1	1.4							20	55			1	2	1.1	0.9	1.1							17	42			1	1	0.5	1	1							13	38			1	2	0.3
	Max	3	3	1.9	2	2							32	87			3	3	1.8	2.9	2.9							30	75			2	2	1.2	2	2							22	57			2	3	0.8
				P value							1
	TIME (ANOVA and LSD)	P	Z and Zc	0							2
		Pc	Z and Zc	0							3
		Z	Zc	0.443
		P	Pc	0.913							each recapitulation and irrigation				10sec
	TORQUE (Kruskall Wallis)	All		0.557							last recap and irrigation				5sec
[truncated: 9 more columns]

## Sheet: NEEDED Shaping
	P	Canal style	Level																Pc	Canal style	Level																Zc	Canal style	Level
			0		1		2		3		4		5		6		7				0		1		2		3		4		5		6		7				0		1		2		3		4		5
			Inner	Out	Inner	Out	Inner	Out	Inner	Out	Inner	Out	Inner	Out	Inner	Outer	Inner	Outer			Inner	Out	Inner	Out	Inner	Out	Inner	Out	Inner	Out	Inner	Out	Inner	Outer	Inner	Outer			Inner	Out	Inner	Out	Inner	Out	Inner	Out	Inner	Out	Inner
	1	1	0	0.073	0.064	0.118	0	0.152	0	0.215	0	0.228	0.046	0.256	0.121	0.156	0.217	0.073	6	2	0	0.033	0	0.029	0.062	0.084	0	0.048	0.046	0.103	0.072	0.121	0.095	0.126	0.09	0.101	4	1	0.03	0.056	0.035	0.072	0.061	0.055	0.095	0.081	0.085	0.108	0.097
	9	1	0.036	0	0	0.118	0	0.177	0	0.219	0	0.229	0.022	0.191	0.107	0.174	0.138	0.134	10	1	0.062	0	0.076	0.058	0.07	0.088	0.093	0.106	0.084	0.097	0.09	0.068	0.138	0.087	0.175	0.086	8	2	0.023	0.19	0.029	0.061	0.091	0.05	0.078	0.088	0.128	0.08	0.155
	13	2	0	0	0	0.034	0	0.07	0	0.115	0.046	0.109	0.082	0.136	0.095	0.141	0.132	0.118	14	1	0	0.032	0.032	0.12	0.036	0.111	0.05	0.148	0.081	0.161	0.107	0.129	0.12	0.124	0.201	0.139	12	2	0.096	0	0	0.051	0.06	0.033	0.043	0.042	0.106	0.076	0.132
	17	2	0.069	0	0.032	0.043	0.069	0.062	0.049	0.102	0.062	0.097	0.112	0.097	0.131	0.069	0.139	0.069	18	1	0.017	0	0	0.087	0	0.089	0	0.097	0	0.136	0.067	0.149	0.09	0.138	0.126	0.119	15	3	0	0	0.043	0	0.08	0.056	0.021	0	0.047	0	0.079
	20	2	0.027	0	0.012	0.063	0.026	0.088	0.038	0.146	0.058	0.11	0.098	0.115	0.133	0.082	0.184	0.089	22	3	0.02	0	0.05	0.056	0.047	0.092	0.05	0.099	0.044	0.09	0.073	0.121	0.092	0.112	0.124	0.126	21	2	0	0	0	0	0.016	0.032	0	0.05	0.04	0.058	0.088
	25	3	0.079	0	0	0	0.019	0.02	0.038	0.044	0.112	0.075	0.145	0.078	0.163	0	0.178	0.048	26	1	0.055	0	0	0.103	0.012	0.079	0	0.119	0.05	0.107	0.101	0.035	0.151	0.059	0.186	0.063	24	1	0.055	0	0.048	0.053	0.056	0.078	0.096	0.104	0.081	0.102	0.113
	28	3	0.091	0	0.091	0.038	0.11	0.039	0.15	0.071	0.169	0.069	0.198	0.05	0.256	0.04	0.314	0.044	30	1	0.039	0.012	0.041	0.056	0.05	0.063	0.056	0.091	0.106	0.115	0.118	0.096	0.164	0.106	0.204	0.062	29	1	0.037	0.046	0.047	0.088	0.067	0.07	0.123	0.095	0.086	0.093	0.119
	37	2	0.069	0	0.029	0	0.043	0.037	0.056	0.056	0.075	0.064	0.08	0.049	0.111	0.09	0.161	0.073	34	1	0	0.064	0	0.058	0	0.122	0	0.149	0	0.189	0.04	0.161	0.082	0.138	0.095	0.141	40	3	0.054	0	0.083	0.065	0.069	0.103	0.071	0.089	0.119	0.075	0.089
	42	2	0.037	0.064	0.055	0.057	0.1	0.063	0.065	0.14	0.122	0.115	0.178	0.089	0.232	0.069	0.297	0.076	38	2	0.037	0.032	0	0.055	0	0.083	0	0.143	0.063	0.136	0.087	0.141	0.152	0.149	0.229	0.131	44	2	0.055	0	0.05	0.058	0.065	0.061	0.062	0.088	0.101	0.123	0.136
	45	3	0.055	0	0.041	0.049	0.032	0.094	0.053	0.135	0.07	0.131	0.095	0.11	0.157	0.118	0.213	0.092	41	2	0.108	0	0.091	0	0.073	0	0.14	0	0.189	0	0.164	0	0.205	0	0.311	0	48	1	0.049	0	0.014	0	0.072	0.035	0.04	0.057	0.105	0.094	0.113
	49	2	0.102	0	0.103	0.063	0.131	0.069	0.14	0.102	0.174	0.102	0.205	0.112	0.259	0.093	0.258	0.09	46	2	0.06	0	0.06	0.042	0.047	0.047	0.064	0.088	0.116	0.116	0.14	0.082	0.17	0.071	0.218	0.082	52	2	0.042	0.019	0.036	0.059	0.059	0.06	0.053	0.086	0.125	0.118	0.125
	53	1	0.042	0.06	0	0.082	0.032	0.11	0	0.158	0.053	0.171	0.106	0.131	0.144	0.132	0.18	0.107	50	2	0.041	0	0.041	0.036	0.096	0.053	0.092	0.072	0.117	0.07	0.119	0.089	0.119	0.119	0.134	0.138	60	2	0.061	0	0.077	0.077	0.086	0.049	0.101	0.085	0.112	0.074	0.159
	57	2	0.028	0	0.021	0.052	0.069	0.065	0.057	0.092	0.066	0.106	0.136	0.075	0.182	0.075	0.22	0.054	54	3	0.075	0.043	0.058	0.055	0.08	0.058	0.102	0.097	0.106	0.097	0.146	0.062	0.171	0.081	0.261	0.081	63	3	0.046	0	0.091	0	0.093	0	0.112	0	0.15	0	0.152
	61	2	0.035	0.056	0.032	0.082	0.086	0.074	0	0.149	0.04	0.145	0.089	0.151	0.12	0.12	0.185	0.121	58	3	0.032	0.092	0.055	0.099	0.055	0.115	0.089	0.131	0.16	0.16	0.189	0.148	0.216	0.129	0.235	0.148	67	3	0	0.05	0.041	0.083	0.048	0.084	0.048	0.121	0.083	0.105	0.099
	AVG		0.0478571	0.0180714	0.0342857	0.0570714	0.0512143	0.08	0.0461429	0.124571	0.0747857	0.125071	0.113714	0.117143	0.157929	0.0970714	0.201143	0.0848571			0.039	0.022	0.036	0.061	0.0448571	0.0774286	0.0525714	0.0991429	0.083	0.112643	0.108071	0.100143	0.140357	0.102786	0.184929	0.101214			0.0391429	0.0257857	0.0424286	0.0476429	0.0659286	0.0547143	0.0673571	0.0704286	0.0977143	0.079	0.118286
	SD		0.0311025	0.0298573	0.033637	0.0355581	0.0433167	0.0429472	0.0488323	0.0525133	0.0530445	0.0523222	0.0536763	0.0555876	0.0547898	0.0468557	0.0566254	0.0277291			0.0313148	0.0289748	0.0313639	0.0319085	0.031503	0.0318209	0.0468856	0.0407938	0.0545118	0.0457024	0.0411628	0.0472178	0.0427328	0.0400638	0.0649396	0.0417155			0.0270778	0.0518165	0.0277314	0.0330142	0.0196722	0.0255085	0.0357009	0.0363143	0.0302335	0.0381273	0.0261488
	Min		0	0	0	0	0	0.02	0	0.044	0	0.064	0.022	0.049	0.095	0	0.132	0.044			0	0	0	0	0	0	0	0	0	0	0.04	0	0.082	0	0.09	0			0	0	0	0	0.016	0	0	0	0.04	0	0.079
	Max		0.102	0.073	0.103	0.118	0.131	0.177	0.15	0.219	0.174	0.229	0.205	0.256	0.259	0.174	0.314	0.134			0.108	0.092	0.091	0.12	0.096	0.122	0.14	0.149	0.189	0.189	0.189	0.161	0.216	0.149	0.311	0.148			0.096	0.19	0.091	0.088	0.093	0.103	0.123	0.121	0.15	0.123	0.159
[truncated: 59 more columns]

## Sheet: Torque and time table
Maxtorque	P	14	1.68571	0.191581
	Pc	14	1.60714	0.442831
	Z	14	1.58571	0.265611			Time (Seconds)		Maximum torque (N.cm)
	Zc	14	1.62857	0.289372			Mean	SD	Mean	SD
	Total	56	1.62679	0.304805		ProTaper Next (n=14)	64.36a	9.74	1.68571	0.191581
Time	P	14	24.3571	3.67124		ProTaper Next with Cooling (n=14)	62.71a	9.31	1.60714	0.442831
	Pc	14	24.8571	3.61316		ZenFlex (n=14)	49.57b	9.16	1.58571	0.265611
	Z	14	18.8571	2.85164		ZenFlex with Cooling (n=14)	47.00b	7.79	1.62857	0.289372
	Zc	14	17.7143	2.92018
	Total	56	21.4464	4.5364
										Time
										P	Pc	Z	Zc
										64.3571	62.7143	49.5714	47
										9.74764	9.31028	9.16275	7.78559
										55	42	40	38
										87	75	70	57
